# Supplementary material
Source: PubMed Central journal article supplement (PMC5834723)
Supplement: pnas.201720940SI.pdf [file pnas.201720940SI.pdf]

# Supporting Information

Montgomery et al. 10.1073/pnas.1720940115

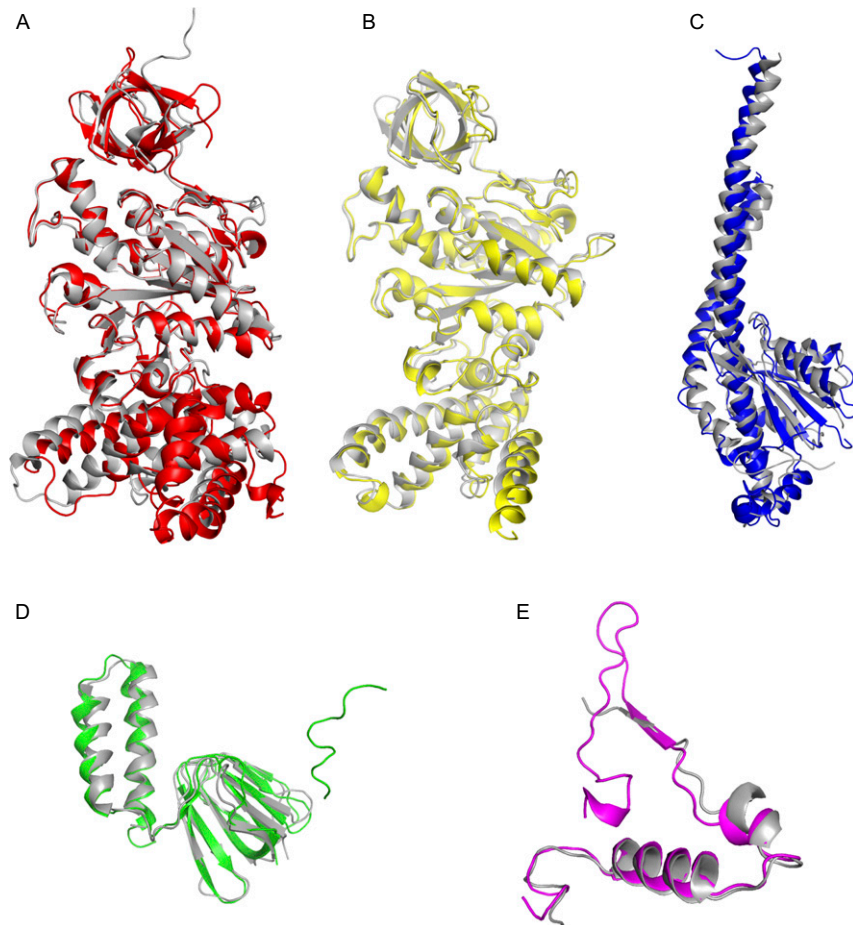

**Fig. S1.** Comparison of individual subunits of the F<sub>1</sub>-ATPase from *T. brucei* with orthologs in the bovine F<sub>1</sub>-ATPase inhibited by dicyclohexylcarbodiimide (12). The *T. brucei* subunits are colored, and bovine subunits are in gray. (A) The  $\alpha_{DP}$ -subunit (red; rmsd 2.3 Å). (B) The  $\beta_{DP}$ -subunit (yellow; rmsd 2.0 Å). (C) The  $\gamma$ -subunit (blue; rmsd 3.8 Å). (D) The  $\delta$ -subunit (green; rmsd 2.1 Å). (E) The  $\epsilon$ -subunit (magenta; rmsd 1.8 Å).

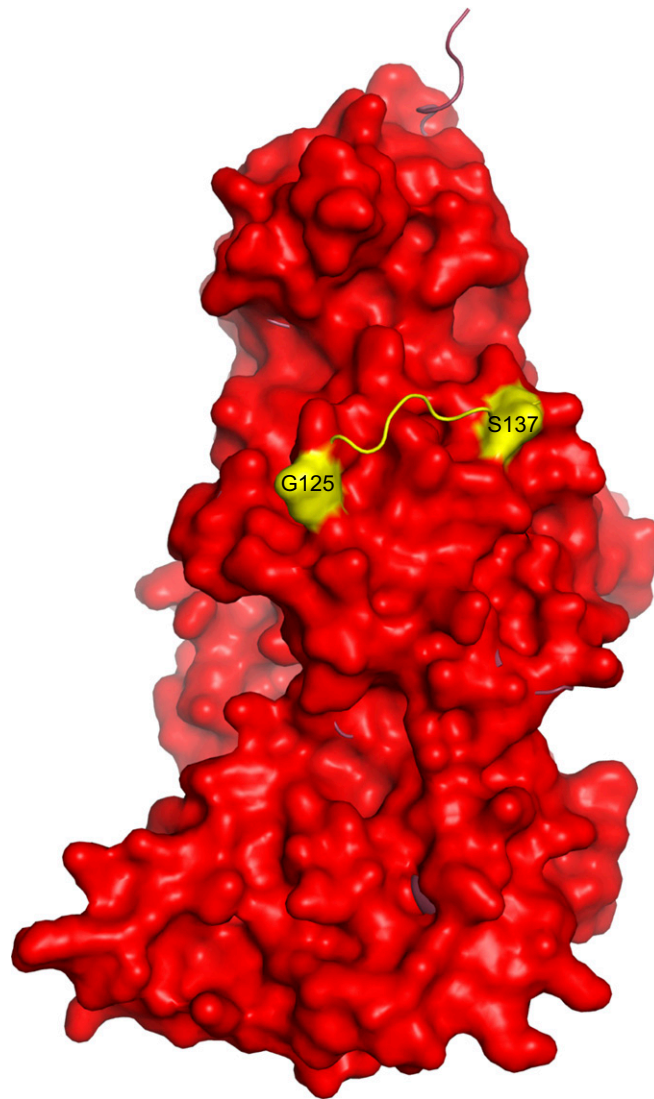

**Fig. S2.** The sites of proteolytic cleavage in the  $\alpha$ -subunits of the  $F_1$ -ATPase from *T. brucei*. Shown is a cartoon representation of the  $\alpha_{DP}$ -subunit from *T. brucei*, in surface representation, overlaid onto the equivalent subunit from the bovine enzyme inhibited by dicyclohexylcarbodiimide (12) (mainly hidden by the *T. brucei* surface). The proteolytic cleavages in the *T. brucei* subunit follow residues 127 and 135, removing 128–135. Residues G125 and S137 are in yellow. The equivalent region in the bovine  $\alpha_{DP}$ -subunit, residues 117–123, is not cleaved by proteolysis and forms a solvent-exposed loop in yellow.

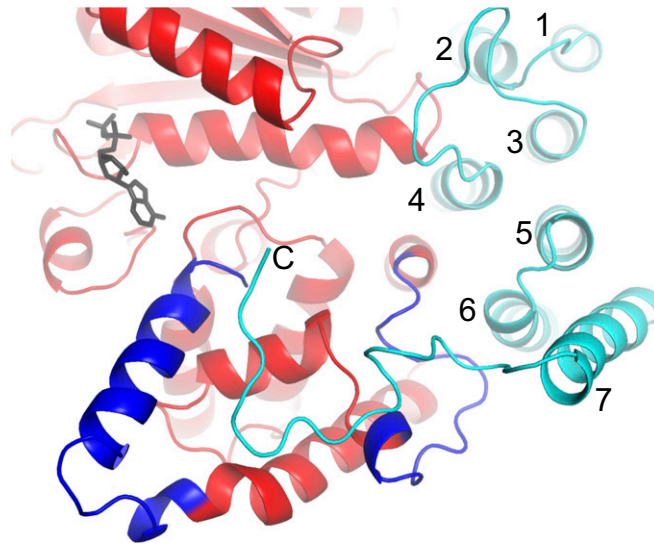

**Fig. S3.** The roles of the additional segments of the sequences in the  $\alpha$ -subunits of the  $F_1$ -ATPase from *T. brucei*. The parts of the nucleotide-binding and C-terminal domains of the  $\alpha_E$ -subunit that interact with the p18-subunit (cyan) are shown in red, except for the additional segments (residues 483–498 and 536–560), which are in royal blue for emphasis. A bound ADP molecule is in black. The  $\alpha$ -helices in subunit p18 are numbered 1–7.

|       |     |                                         |        |
|-------|-----|-----------------------------------------|--------|
|       | 18  | -TNTAPWIEKIKKCKYYDEAGEVLVNMVSNCPDI--    | 52     |
| p18   | 57  | -ATLQCIYQSPSKQSTPVDNESKFCAMMDLLEEMQH--  | 91     |
|       | 100 | -ESWTWWMKECVKSGQFRLGYCIQQVMETECKGCPA--  | 142    |
|       |     | --TYNALINAYAK-G--EEA--LY--M--G--PN----  | PPRcon |
|       | 71  | -SALEMVVRALGREQHDVACALLDETPLPPGSRLD--   | 105    |
|       | 107 | -RAYTTVLHALSRAGRYERALELFAELRRQGVAPTL--  | 141    |
|       | 142 | -VTYNNVLDVYGRMGRSWPRIVALLEDMRAAGVEPD--  | 176    |
|       | 178 | -FTASTVIAACSRDGLVDEAVAFEDLKRGHAPSV--    | 212    |
|       | 213 | -VTYNALLQVFGKAGNYTEALRVLGEMEONGCQPD--   | 247    |
|       | 248 | -VTYNELAGTYARAGFFEEAARCLDTMASKGLLPNA--  | 282    |
|       | 283 | -FTYNTVMTAYGNVGVDEALALFDQMKKTGFVPNV--   | 317    |
|       | 318 | -NTYNLVLGMLGKKSFRFTVMLEMLGEMSRSGCTPNR-- | 352    |
| PPR10 | 353 | -VTWNTMLAVSGKRGMEDYVTRVLEGMRS SGVELSR-- | 387    |
|       | 388 | -DTYNTLIAAYGRCGSRTNAFKMYNEMTSAGFTPCI--  | 422    |
|       | 423 | -TTYNALLNVL SRQGDWSTAQSIVSKMRTKGFKPNE-- | 457    |
|       | 458 | -QSYSLLLQCYAKGGNVAGIAAIEVEYVGS GAVFPS-- | 492    |
|       | 494 | -VILRTLVIANFKRRLDGMETAFAQEVKARGYNPDL--  | 528    |
|       | 529 | -VIFNSMLS IYAKNGMYSKATEVFDSIKRSGLSPDL-- | 563    |
|       | 564 | -ITYNSLMDMYAKCSESWEAEKILNQLKCSQTMKPD--  | 598    |
|       | 600 | -VSYNTVINGFCKQGLVKEAQRVLSMVADGMAPCA--   | 634    |
|       | 635 | -VTYHTLVGGYSSLEMFSEAREVIGYMVQHGLKPME--  | 669    |
|       | 670 | -LYRRVVESYCRAKRFEEARGFLSEVSETDLDFDK--   | 704    |

**Fig. S4.** Comparison of the PPR sequences in the p18-subunit of the  $F_1$ -ATPase from *T. brucei* and the 18 PPRs in the PPR10 protein from *Z. mays* with the PPR consensus sequence (red) (56). The sequences of the four PPR10 domains used in the structural comparison shown in Fig. 3 are in blue. The PPRs in subunit p18 were predicted with TPRpred (73). The alignment was produced manually.

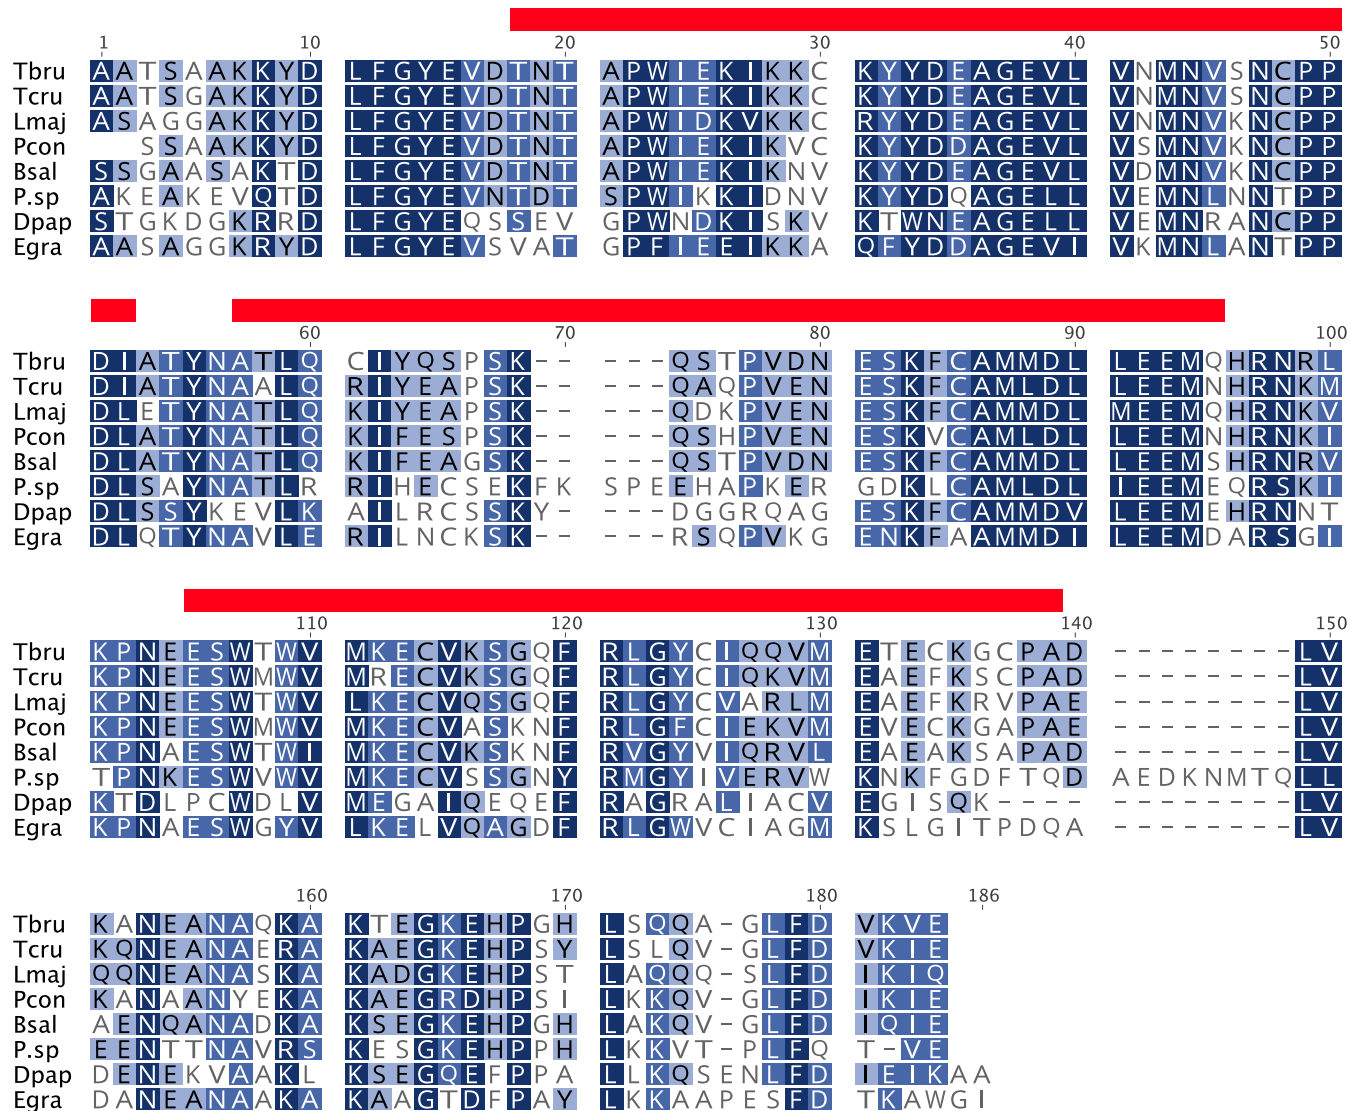

Fig. S5. Conservation of sequences of p18-subunits of ATP synthases from euglenozoa. Bsal, *Bodo saltans*; Dpap, *Diplonema papillatum*; Egra, *Euglena gracilis*; Lmaj, *Leishmania major*; Pcon, *Paratrypanosoma confusum*; P. sp, *Perkinsela sp*; Tbru, *T. brucei*; Tcru, *Trypanosoma cruzi*. Identities and conservative substitutions are shown in dark blue and light blue, respectively. The red bars indicate the PPR domains predicted by TPRpred (73).

**Table S1. Data collection and refinement statistics for the F<sub>1</sub>-ATPase from *T. brucei***

| Parameter                                  | Value                       |
|--------------------------------------------|-----------------------------|
| Space group                                | P2 <sub>1</sub>             |
| Unit cell dimensions a, b, c, Å; β         | 124.2, 206.3, 130.2; 104.9° |
| Resolution range, Å                        | 3.20–90.51                  |
| High-resolution bin, Å                     | 3.20–3.25                   |
| No. of unique reflections                  | 102,391 (5,076)             |
| Multiplicity                               | 3.5 (3.7)                   |
| Completeness, %                            | 98.2 (97.6)                 |
| R <sub>merge</sub> <sup>*</sup>            | 0.123 (0.565)               |
| <I/σ(I)>                                   | 8.1 (2.8)                   |
| B factor, from Wilson plot, Å <sup>2</sup> | 46.5                        |
| R factor <sup>†</sup> , %                  | 27.2                        |
| R <sub>free</sub> <sup>‡</sup> , %         | 29.7                        |
| rmsd of bonds, Å                           | 0.007                       |
| rmsd of angles, °                          | 1.07                        |

Statistics for the highest-resolution bin are in parentheses.

\*R<sub>merge</sub> =  $\sum_h \sum_i |I(h) - \langle I(h) \rangle| / \sum_h \sum_i I(h)_i$ , where  $I(h)$  is the mean weighted intensity after rejection of outliers.

†R factor =  $\sum_{hkl} |F_{obs}| - k|F_{calc}| / \sum_{hkl} |F_{obs}|$ , where  $F_{obs}$  and  $F_{calc}$  are the observed and calculated structure factor amplitudes, respectively.

‡R<sub>free</sub> =  $\sum_{hkl \in T} |F_{obs}| - k|F_{calc}| / \sum_{hkl \in T} |F_{obs}|$ , where  $F_{obs}$  and  $F_{calc}$  are the observed and the calculated structure factor amplitudes, respectively, and  $T$  is the test set of data omitted from refinement.

**Table S2. Buried surface areas of catalytic interfaces in selected structures of F<sub>1</sub>-ATPases**

| Structure                                                     | Buried surface area of catalytic interface, Å <sup>2</sup> |              |       |
|---------------------------------------------------------------|------------------------------------------------------------|--------------|-------|
|                                                               | Diphosphate                                                | Triphosphate | Empty |
| <i>T. brucei</i>                                              | 2,300                                                      | 2,400        | 1,900 |
| <i>S. cerevisiae</i> (PDB ID code 2HLD; molecule 1)           | 2,000                                                      | 2,300        | 1,900 |
| Bovine phosphate release dwell (PDB ID code 2JDI)             | 3,000                                                      | 2,200        | 1,900 |
| Bovine catalytic dwell (PDB ID code 4ASU)                     | 2,500                                                      | 2,200        | 1,800 |
| Bovine inhibited with ADP-AlF <sub>4</sub> (PDB ID code 1H8E) | 2,800                                                      | 2,100        | 2,300 |
| <i>C. thermarum</i> wild type (PDB ID code 5HKK)              | 2,900                                                      | 2,000        | 1,900 |
